# Supplementary material for: Cross-seeding of prions by aggregated α-synuclein leads to transmissible spongiform encephalopathy
Source: PubMed Central journal article supplement (PMC5567908; doi:10.1371/journal.ppat.1006563), 2017-08-10

Figure S5

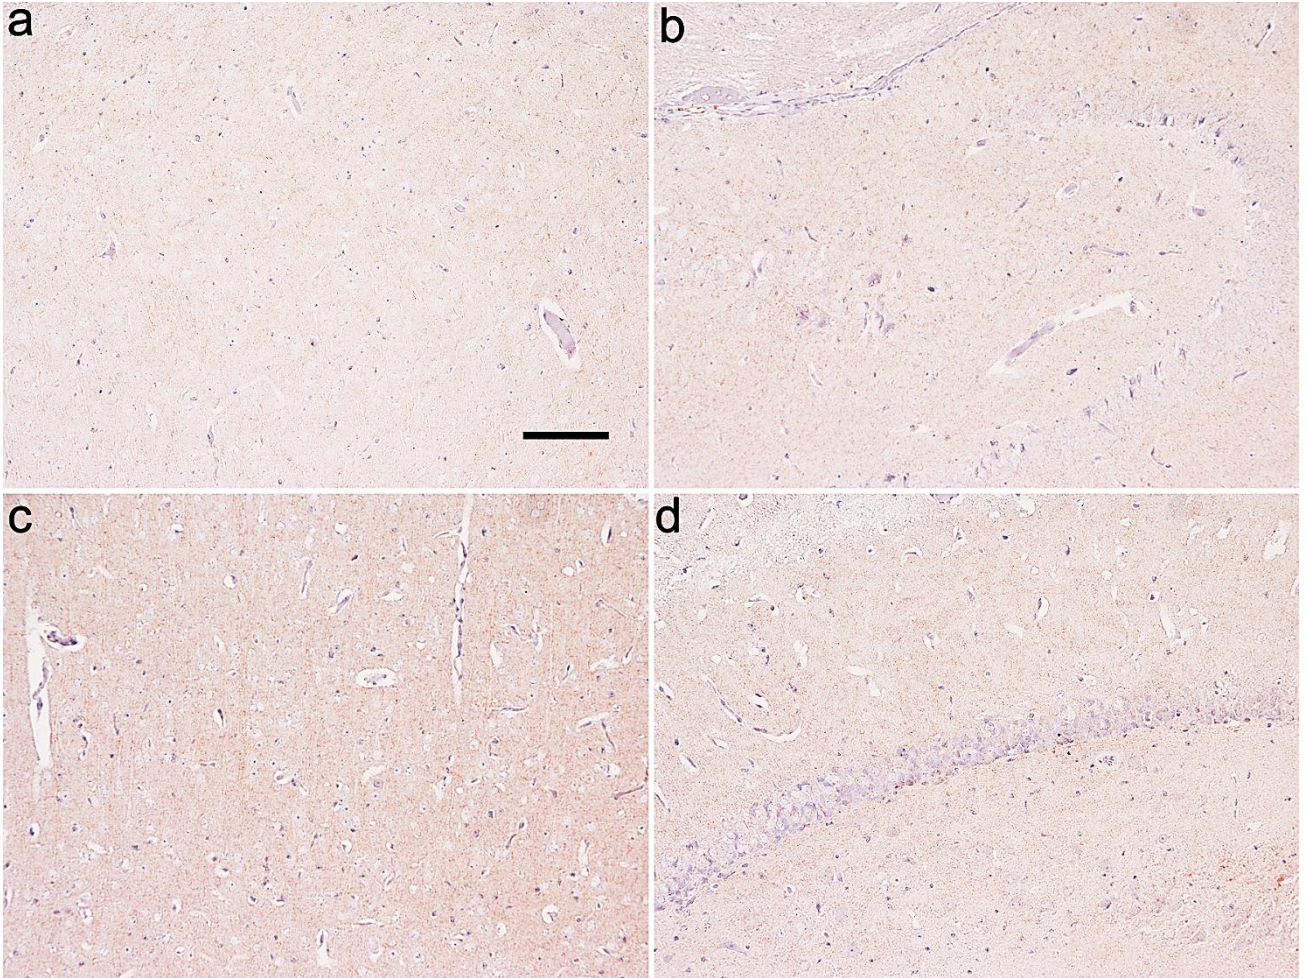

Supplement: ppat.1006563.s006.pdf [file ppat.1006563.s006.pdf]
